# Supplementary material for: Comparison between seismic and domestic risk in moderate seismic hazard prone region: the Grenoble City (France) test site
Source: Copernicus journal article supplement (doi:10.5194/nhess-12-511-2012), 2012-02-29

# Comparison between seismic and domestic risk in moderate seismic hazard prone region: the Grenoble City (France) test site

Francois Dunand and Philippe Gueguen

## **Electronic supplement:**

100-year probability of damage grade D2 (A), D5 (B) and individual mortality (C). On each figure are displayed the median value  $\pm$  standard deviation corresponding to the hazard curves (from left to right) and the vulnerability assessment (from top to bottom). Triangle represent the localization of schools, assessed following the same process as for urban area.

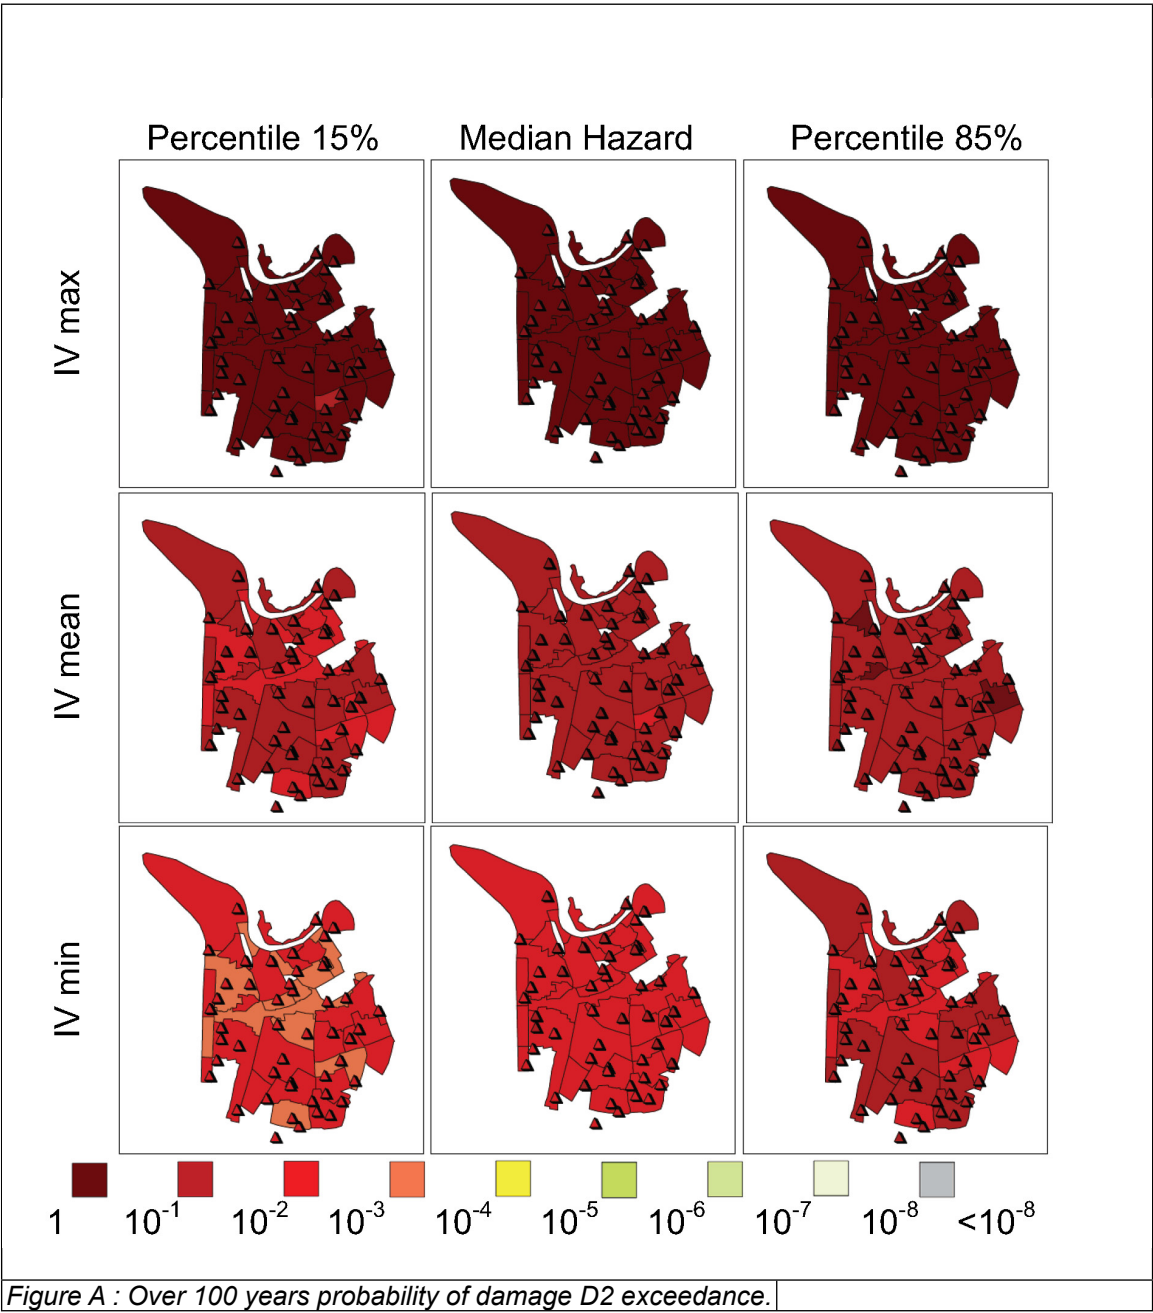

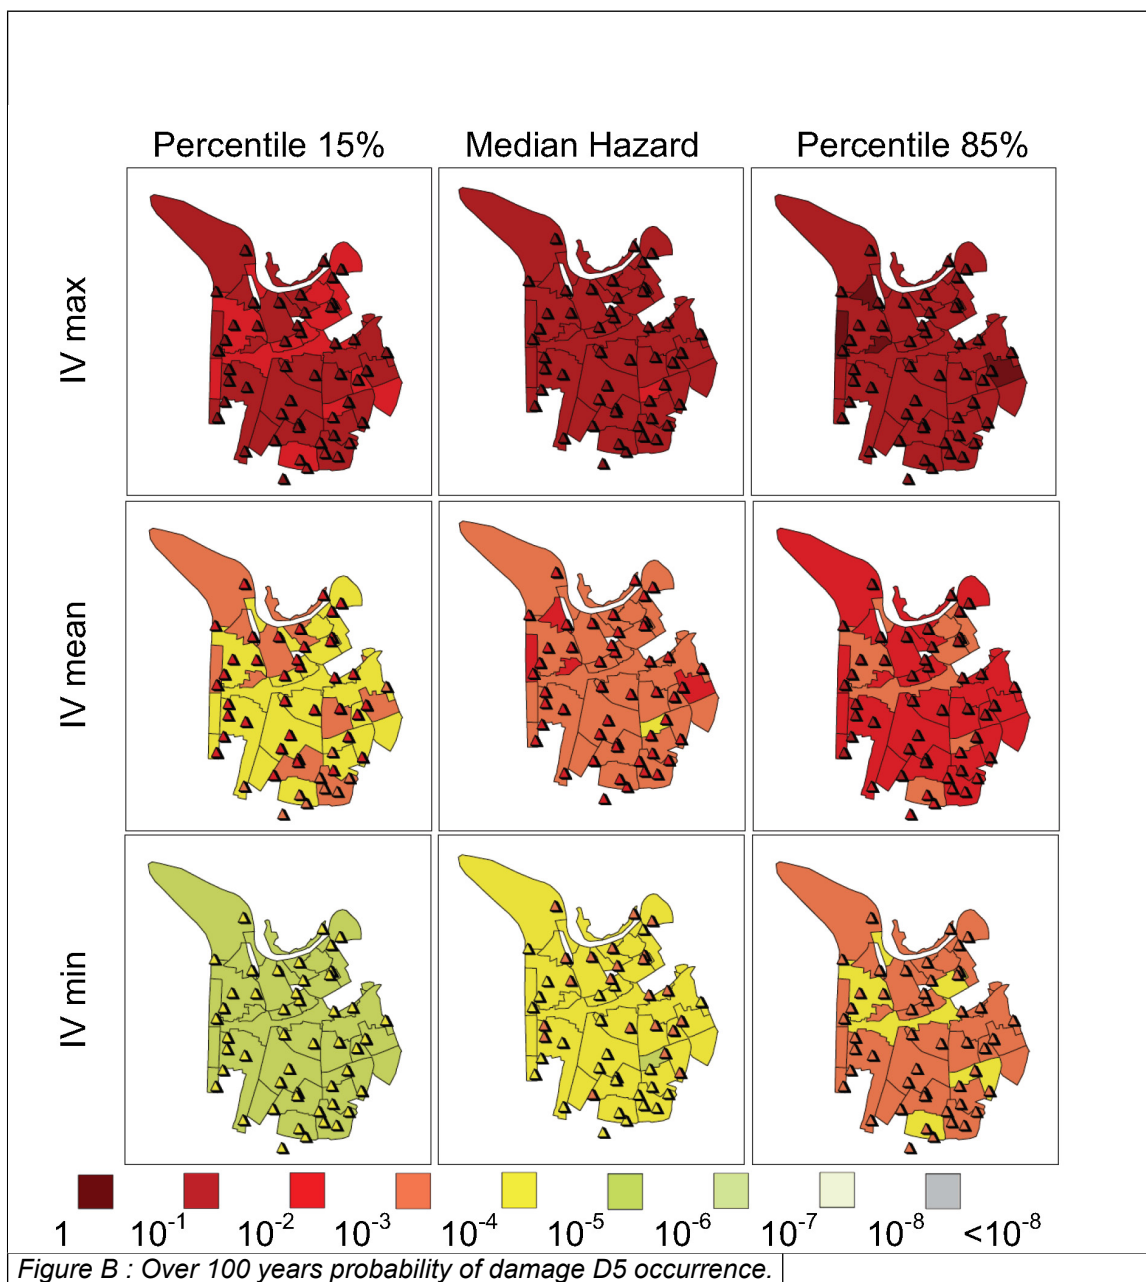

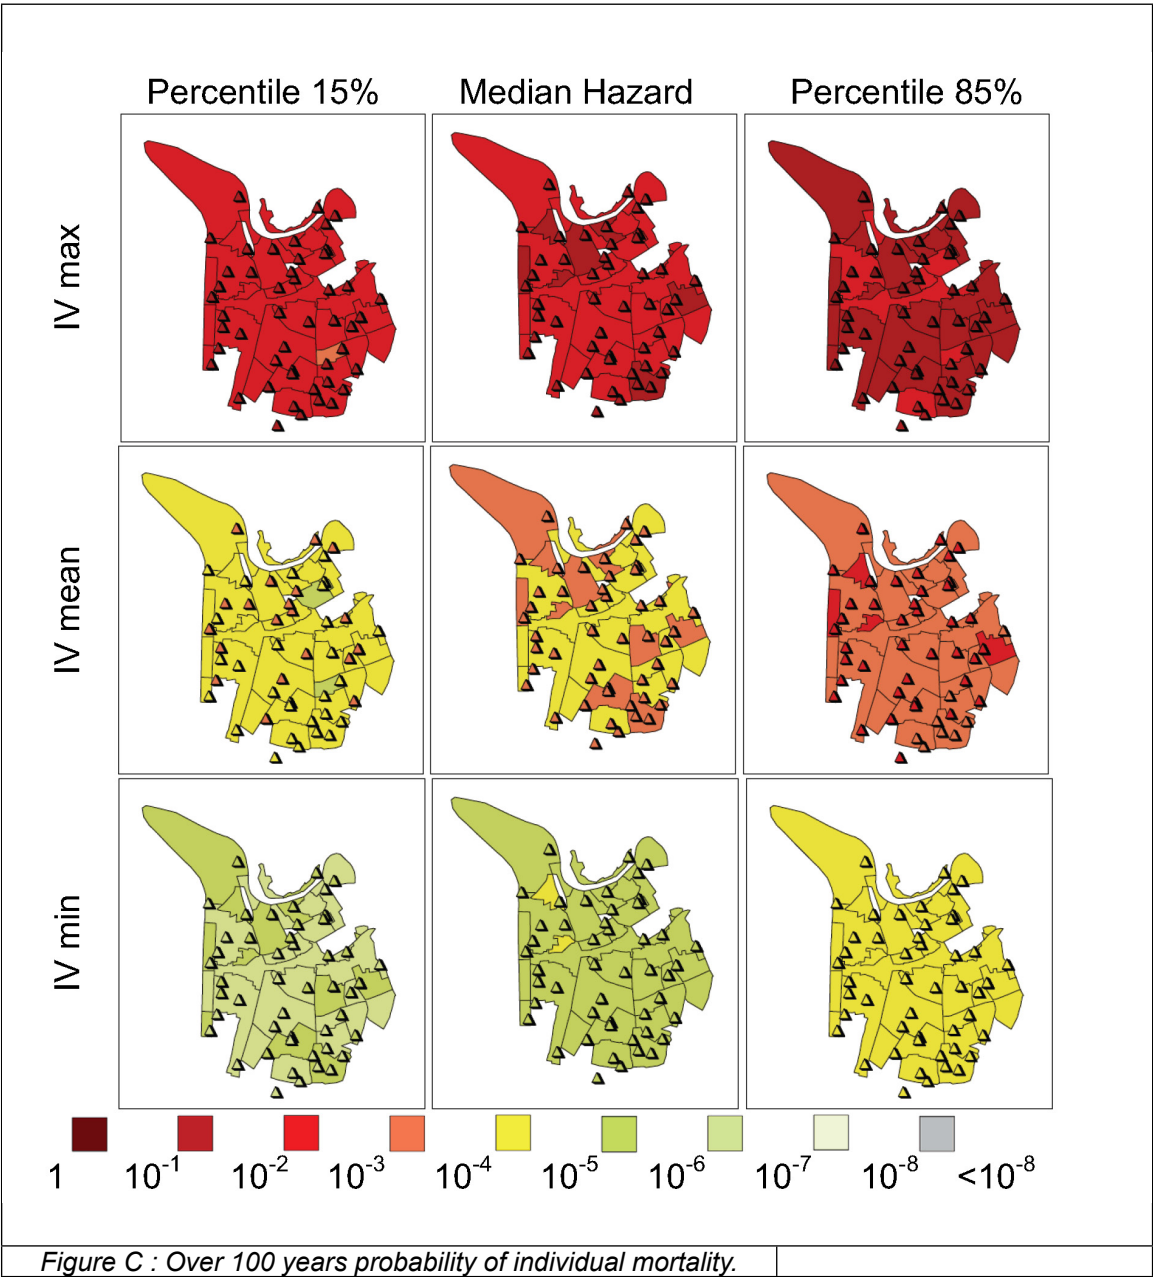

Supplement: Supplementary file 1 [file nhess-12-511-2012-supplement.pdf]
